# Supplementary material for: Examining the Relationship between Cardiorespiratory Fitness and Body Weight Status: Empirical Evidence from a Population-Based Survey of Adults in Taiwan
Source: Hindawi journal article supplement (doi:10.1155/2014/463736), 2014-01-01
Supplement: f1 [file 463736.f1.pdf]

Appendix (for review only)

Table A1: Estimation of the cardiopulmonary fitness equations with BMI.

| Variable   | Male        |       | Female      |       |
|------------|-------------|-------|-------------|-------|
|            | Coefficient | SE    | Coefficient | SE    |
| <b>BMI</b> | -0.316 ***  | 0.017 | -0.368 ***  | 0.019 |
| Junior     | -1.567 ***  | 0.512 | -2.085 ***  | 0.463 |
| Senior     | -1.882 ***  | 0.449 | -3.932 ***  | 0.401 |
| College    | -3.093 ***  | 0.445 | -6.200 ***  | 0.410 |
| Graduate   | -3.321 ***  | 0.491 | -4.813 ***  | 0.511 |
| Age_1820   | 5.957 ***   | 0.271 | 17.805 ***  | 0.270 |
| Age_2130   | 1.202 ***   | 0.227 | 7.365 ***   | 0.236 |
| Age_3140   | -0.251      | 0.224 | 4.661 ***   | 0.235 |
| Age_4150   | 0.719 ***   | 0.227 | 4.285 ***   | 0.236 |
| Income 1   | -2.504 ***  | 0.297 | -4.249 ***  | 0.428 |
| Income 2   | -2.249 ***  | 0.258 | -3.051 ***  | 0.408 |
| Income 3   | -1.055 ***  | 0.255 | -1.796 ***  | 0.419 |
| Job 1      | -0.399      | 0.362 | -2.558 ***  | 0.314 |
| Job 2      | -2.331 ***  | 0.516 | -3.403 ***  | 0.502 |
| Job 3      | 1.716 ***   | 0.567 | 1.596 *     | 0.866 |
| Job 4      | -1.377 ***  | 0.259 | -4.231 ***  | 0.230 |

|          |            |       |             |       |
|----------|------------|-------|-------------|-------|
| Job 5    | -4.838 *** | 0.269 | -12.417 *** | 0.279 |
| Job 6    | -2.176 *** | 0.376 | -7.839 ***  | 0.474 |
| Job 7    | -2.450 *** | 0.237 | -3.607 ***  | 0.271 |
| Job 8    | -0.108     | 1.213 | -3.981 **   | 1.569 |
| Job 9    | -1.509 *** | 0.388 | -2.531 ***  | 0.411 |
| Job 10   | 1.258 ***  | 0.420 | -3.497 ***  | 0.293 |
| Job 11   | -2.054 *** | 0.280 | -5.141 ***  | 0.379 |
| City     | 0.713 ***  | 0.147 | 0.636 ***   | 0.152 |
| Center   | 0.687 ***  | 0.192 | 3.160 ***   | 0.202 |
| South    | 0.241      | 0.155 | -0.148      | 0.156 |
| East     | -0.823 *** | 0.234 | -1.515 ***  | 0.256 |
| Constant | 69.940 *** | 0.664 | 70.001 ***  | 0.728 |

---

\*\*\*, \*\*, \* indicate significance at the 1%, 5% and 10% levels, respectively.

Table A2: Estimation of the cardiovascular fitness by body weight status.

| Variable           | Male        |       | Female      |       |
|--------------------|-------------|-------|-------------|-------|
|                    | Coefficient | SE    | Coefficient | SE    |
| <b>Underweight</b> | -1.287 ***  | 0.304 | -0.411 *    | 0.221 |
| <b>Overweight</b>  | -0.845 ***  | 0.154 | -1.088 ***  | 0.188 |
| <b>Obese</b>       | -3.353 ***  | 0.170 | -4.645 ***  | 0.224 |
| Junior             | -1.525 ***  | 0.512 | -2.181 ***  | 0.463 |
| Senior             | -1.836 ***  | 0.449 | -3.999 ***  | 0.401 |
| College            | -3.063 ***  | 0.444 | -6.205 ***  | 0.410 |
| Graduate           | -3.336 ***  | 0.491 | -4.839 ***  | 0.511 |
| Age_1820           | 6.140 ***   | 0.271 | 18.106 ***  | 0.270 |
| Age_2130           | 1.245 ***   | 0.228 | 7.658 ***   | 0.237 |
| Age_3140           | -0.211      | 0.224 | 4.785 ***   | 0.235 |
| Age_4150           | 0.774 ***   | 0.227 | 4.309 ***   | 0.236 |
| Income 1           | -2.392 ***  | 0.298 | -4.145 ***  | 0.428 |
| Income 2           | -2.168 ***  | 0.258 | -2.988 ***  | 0.408 |
| Income 3           | -1.014 ***  | 0.255 | -1.767 ***  | 0.419 |
| Job 1              | -0.370      | 0.362 | -2.531 ***  | 0.314 |
| Job 2              | -2.319 ***  | 0.515 | -3.409 ***  | 0.502 |
| Job 3              | 1.685 ***   | 0.567 | 1.629 *     | 0.866 |

|                         |            |       |             |       |
|-------------------------|------------|-------|-------------|-------|
| Job 4                   | -1.327 *** | 0.259 | -4.224 ***  | 0.230 |
| Job 5                   | -4.705 *** | 0.269 | -12.347 *** | 0.279 |
| Job 6                   | -2.123 *** | 0.376 | -7.765 ***  | 0.474 |
| Job 7                   | -2.424 *** | 0.237 | -3.632 ***  | 0.271 |
| Job 8                   | -0.029     | 1.213 | -3.776 **   | 1.569 |
| Job 9                   | -1.479 *** | 0.388 | -2.527 ***  | 0.411 |
| Job 10                  | 1.229 ***  | 0.420 | -3.465 ***  | 0.293 |
| Job 11                  | -1.993 *** | 0.280 | -5.097 ***  | 0.379 |
| City                    | 0.677 ***  | 0.147 | 0.657 ***   | 0.152 |
| Center                  | 0.699 ***  | 0.192 | 3.145 ***   | 0.202 |
| South                   | 0.274 *    | 0.155 | -0.136      | 0.156 |
| East                    | -0.736 *** | 0.234 | -1.454 ***  | 0.257 |
| Constant                | 63.036 *** | 0.512 | 62.206 ***  | 0.568 |
| Adjusted R <sup>2</sup> | 0.05       |       | 0.17        |       |

---

\*\*\*, \*\*, \* indicate significance at the 1%, 5%, and 10% levels, respectively.
